# Supplementary material
Source: publisher figshare collection journal article supplement (https://acs.figshare.com/ndownloader/files/4705720)
Supplement: Supplementary file 1 [file 4705720]

## Synthesis and Chiroptical Study of D-/L-Penicillamine-Capped Silver Nanoclusters

Naoki Nishida,<sup>a</sup> Hiroshi Yao,<sup>a\*</sup> Tomoyasu Ueda,<sup>b</sup> Akito Sasaki,<sup>b</sup> and Keisaku Kimura<sup>a</sup>

<sup>a</sup> Graduate School of Material Science, University of Hyogo, 3-2-1 Koto, Kamigori-cho, Ako-gun, Hyogo 678-1297, Japan

<sup>b</sup> X-ray Research Laboratory, Rigaku Corporation, 3-9-12 Matsubara-cho, Akishima, Tokyo 169-8666, Japan

### Stability of Fractioned Silver Nanoclusters

Figure S1 shows the UV-visible absorption spectra of compound **2<sub>L</sub>** as a function of time. The spectra were recorded immediately after extraction (blue curve) and after 24 hours of the extraction (black curve). In compound **2<sub>L</sub>**, although we can observe a well-defined peak at ~480 nm, it decreases with the passage of time, implying that the compound **2** is relatively unstable in solution.

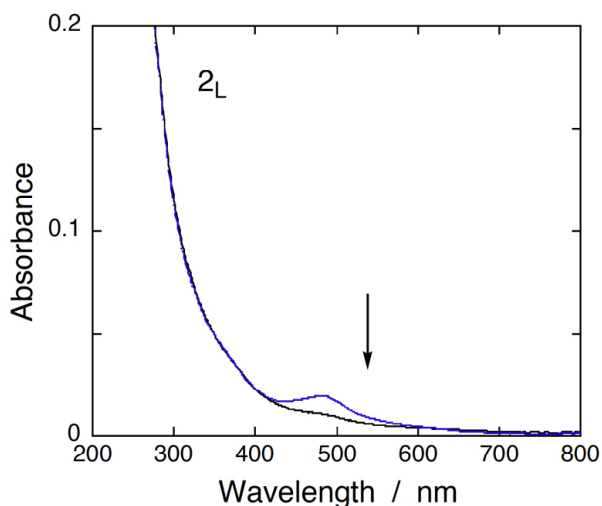

**Figure S1.** UV-visible absorption spectra of compound **2<sub>L</sub>** as a function of time. Blue and black traces were recorded immediately after extraction and after 24 hours of the extraction, respectively.

### Ordinary Absorption and CD Spectra of L-/D-Penicillamine in Aqueous Solution

Figure S2 shows the ordinary absorption (left) and CD spectra (right) of L- and D-penicillamine in aqueous solution. These thiols contribute to the CD signals only in the UV region and show a clear mirror image relationship.

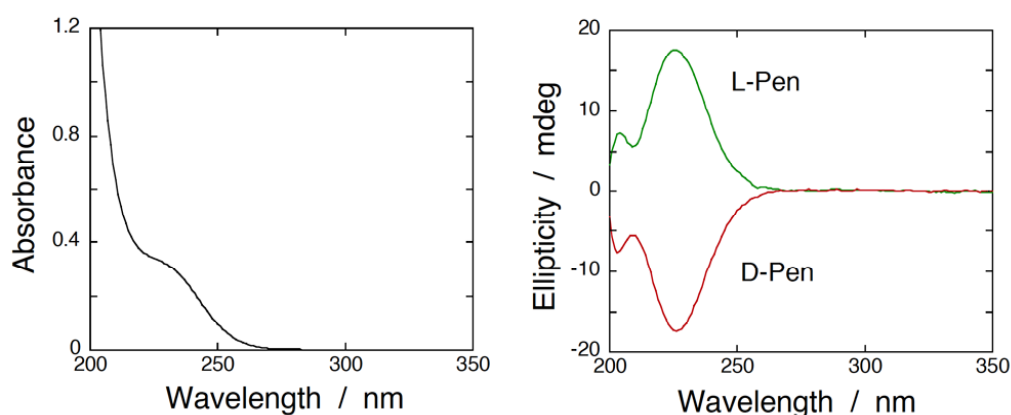

**Figure S2.** Absorption (left) and CD (right) spectra of pure L-Pen and D-Pen in aqueous solution. No CD signals were obtained for *rac*-Pen.

### Spectroscopic Characterizations of Compounds 4 and 6

Figures S3-a and S3-b show the absorption and CD (anisotropy factor) spectra of the fractioned compounds **4** and **6**, respectively. Figure S4 shows the size distributions of compounds **4–6** obtained by SAXS. Both compounds (**4** and **6**) exhibit featureless absorption spectra. The chiroptical response observed in **4<sub>L</sub>**/**4<sub>D</sub>** showed a mirror-image relationship. The

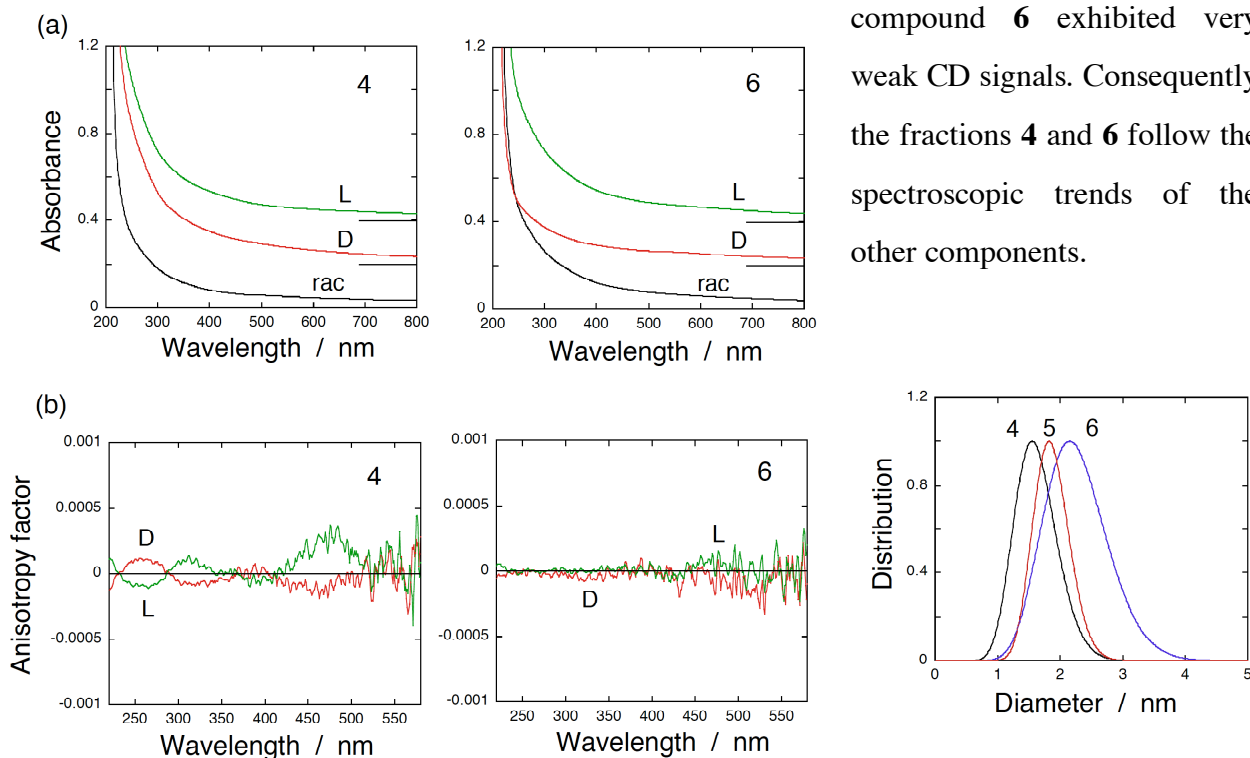

**Figure S3.** (a) Absorption spectra and (b) anisotropy factors of the fractioned cluster compounds **4** and **6**.

**Figure S4.** Size distributions of compounds **4–6** obtained by SAXS.
